# Supplementary material for: Reductions in aircraft particulate emissions due to the use of Fischer–Tropsch fuels
Source: Copernicus journal article supplement (doi:10.5194/acp-14-11-2014), 2014-01-02
Supplement: Supplementary file 1 [file acp-14-11-2014-supplement.pdf]

# Supplement

Table S1. Fuel Properties.

|                                         | JP-8      | Blend-1                 | FT-1        | Blend-2          | FT-2 |
|-----------------------------------------|-----------|-------------------------|-------------|------------------|------|
| Feedstock                               | Petroleum | Petroleum & Natural Gas | Natural Gas | Petroleum & Coal | Coal |
| Sulfur (ppm by mass)                    | 1148      | 699                     | 19          | 658              | 22   |
| Alkanes (% vol.)                        | 50        | not measured            | >99         | not measured     | 88   |
| Alkenes (% vol.)                        | 0.9       | 0.6                     | 0           | 3.3              | 3.8  |
| Aromatics (% vol.)                      | 18.6      | 8                       | 0           | 9.1              | 0.6  |
| Naphthalenes (% vol.)                   | 1.6       | 0.8                     | 0           | 0.8              | 0    |
| Flash Point (°C)                        | 46        | 43                      | 41          | 46               | 42   |
| Specific Gravity <sup>a</sup>           | 0.82      | 0.78                    | 0.74        | 0.79             | 0.76 |
| Freezing Point (°C)                     | -50       | -60                     | -54         | -60              | <-80 |
| Viscosity at -20°C (mm <sup>2</sup> /s) | 4.7       | 3.3                     | 2.6         | 4.1              | 3.6  |
| Cetane Index                            | 41        | 46                      | 58          | 45               | 51   |
| H Content (% mass)                      | 13.6      | 14.5                    | 15.5        | 14.3             | 15.1 |
| Heat of Combust. (MJ/kg)                | 43.3      | 43.8                    | 44.4        | 43.8             | 44.1 |
| Fuel H/C ratio                          | 1.88      | 2.02                    | 2.19        | 1.99             | 2.12 |

<sup>a</sup>Specific gravity is defined as the density of the fuel relative to water (dimensionless)

3

4

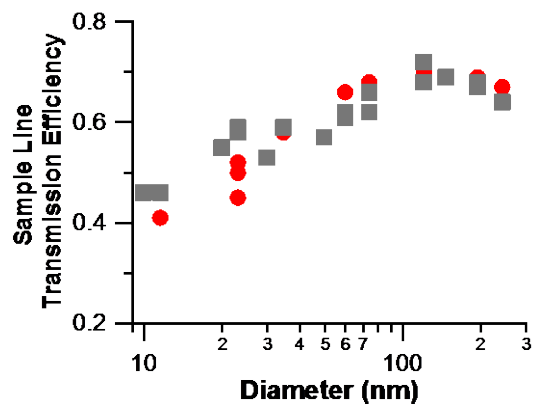

1

2

3 Fig. S1. Sample line transmission efficiencies behind the #3 engine at 1 m

4 (red) and 30 m (grey).

5

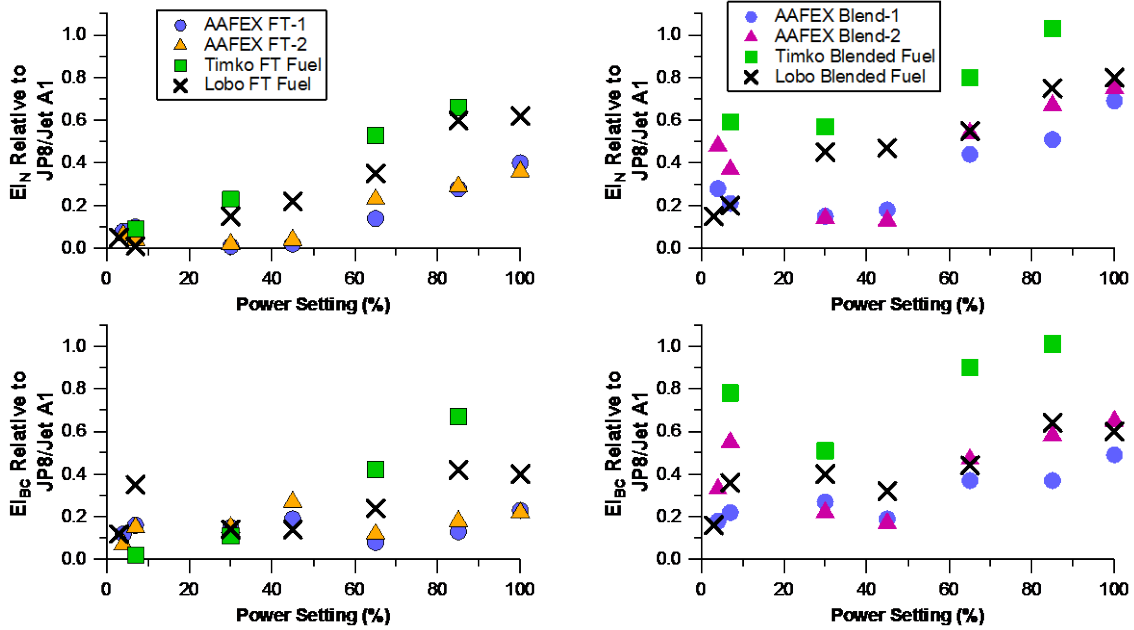

1  
2  
3  
4  
5  
6  
7  
8  
9

Fig. S2. Relative emission indices for the current study, Timko et al. (2010) and Lobo et al. (2011).  $EI_N$  values for FT fuels (left, top) and 50/50 blended fuels (right, top) are normalized to a standard fuel (JP-8 for AAFEX and Timko et al.; Jet A1 for Lobo et al.). Similarly, normalized  $EI_{BC}$  values are shown in the bottom panels. Values are directly from Table 5 in Timko et al. and approximated from Figure 2 in Lobo et al. Data is from the #3 engine solely.

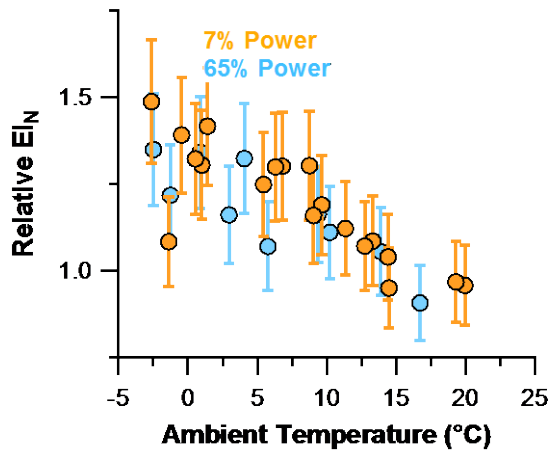

1

2

3 Fig. S3. JP-8  $EI_N(T)$  plotted relative to the interpolated  $EI_N$  at 15°C (the ICAO  
 4 standard temperature) for 7 and 65% power. Data is from the #2 engine solely. Measurement  
 5 uncertainties of 12% are shown by the error bars.
